# Supplementary figures and images for: ARRDC3 suppresses breast cancer progression by negatively regulating integrin β4
Source: PubMed Central journal article supplement — Oncogene. 2010 Jul 5;29(36):5032–47. doi: 10.1038/onc.2010.250 (PMC2997682; doi:10.1038/onc.2010.250), 2010-07-05

Supplementary Figure 1.

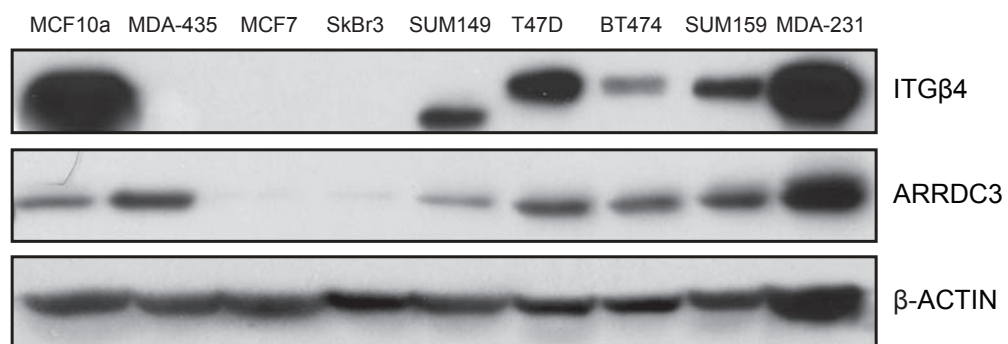

Supplementary Figure 2.

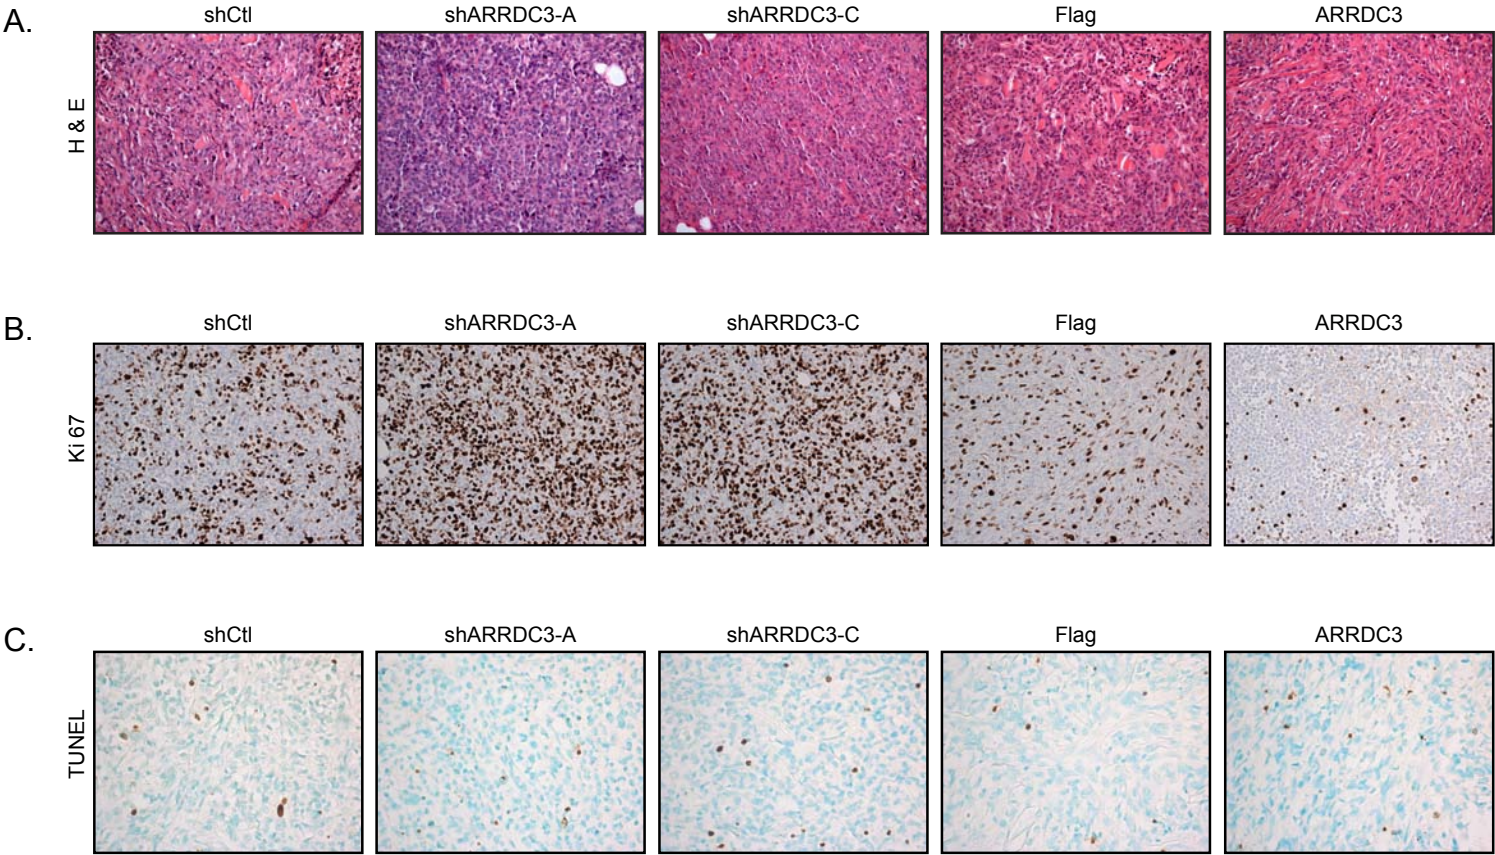

### Supplementary Figure 3.

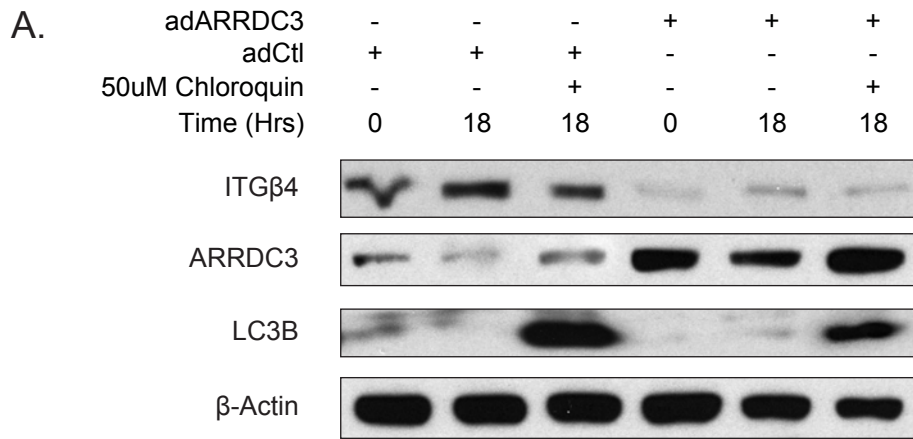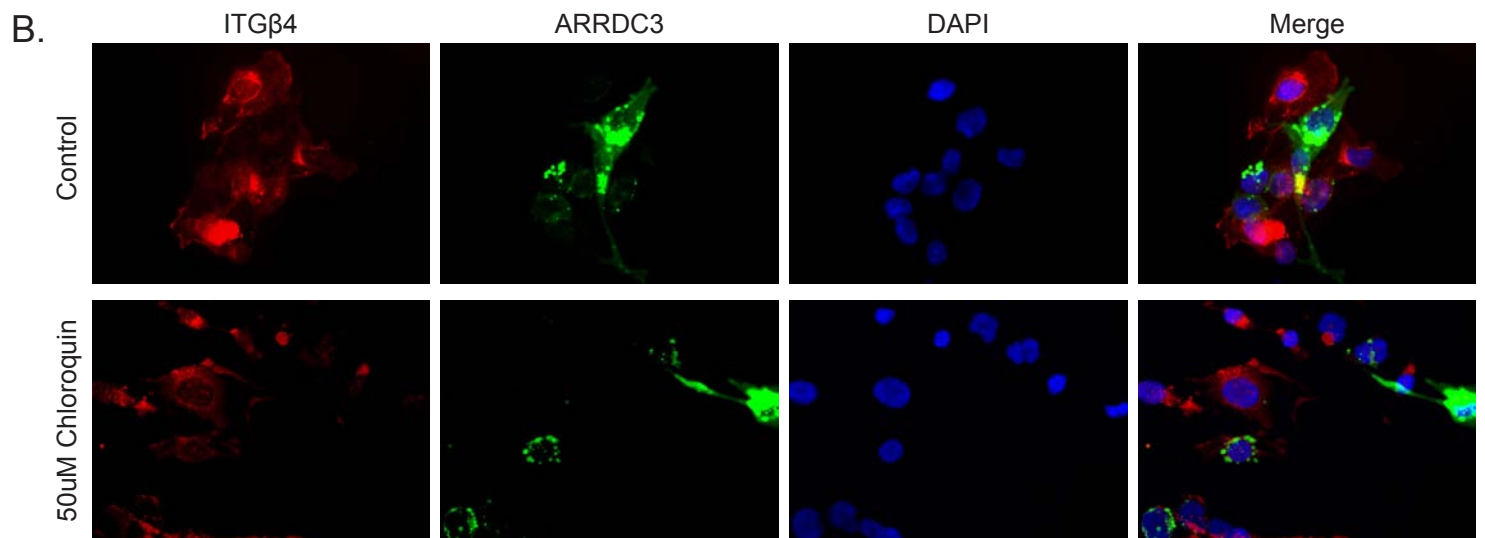

# Supplementary Figure 4.

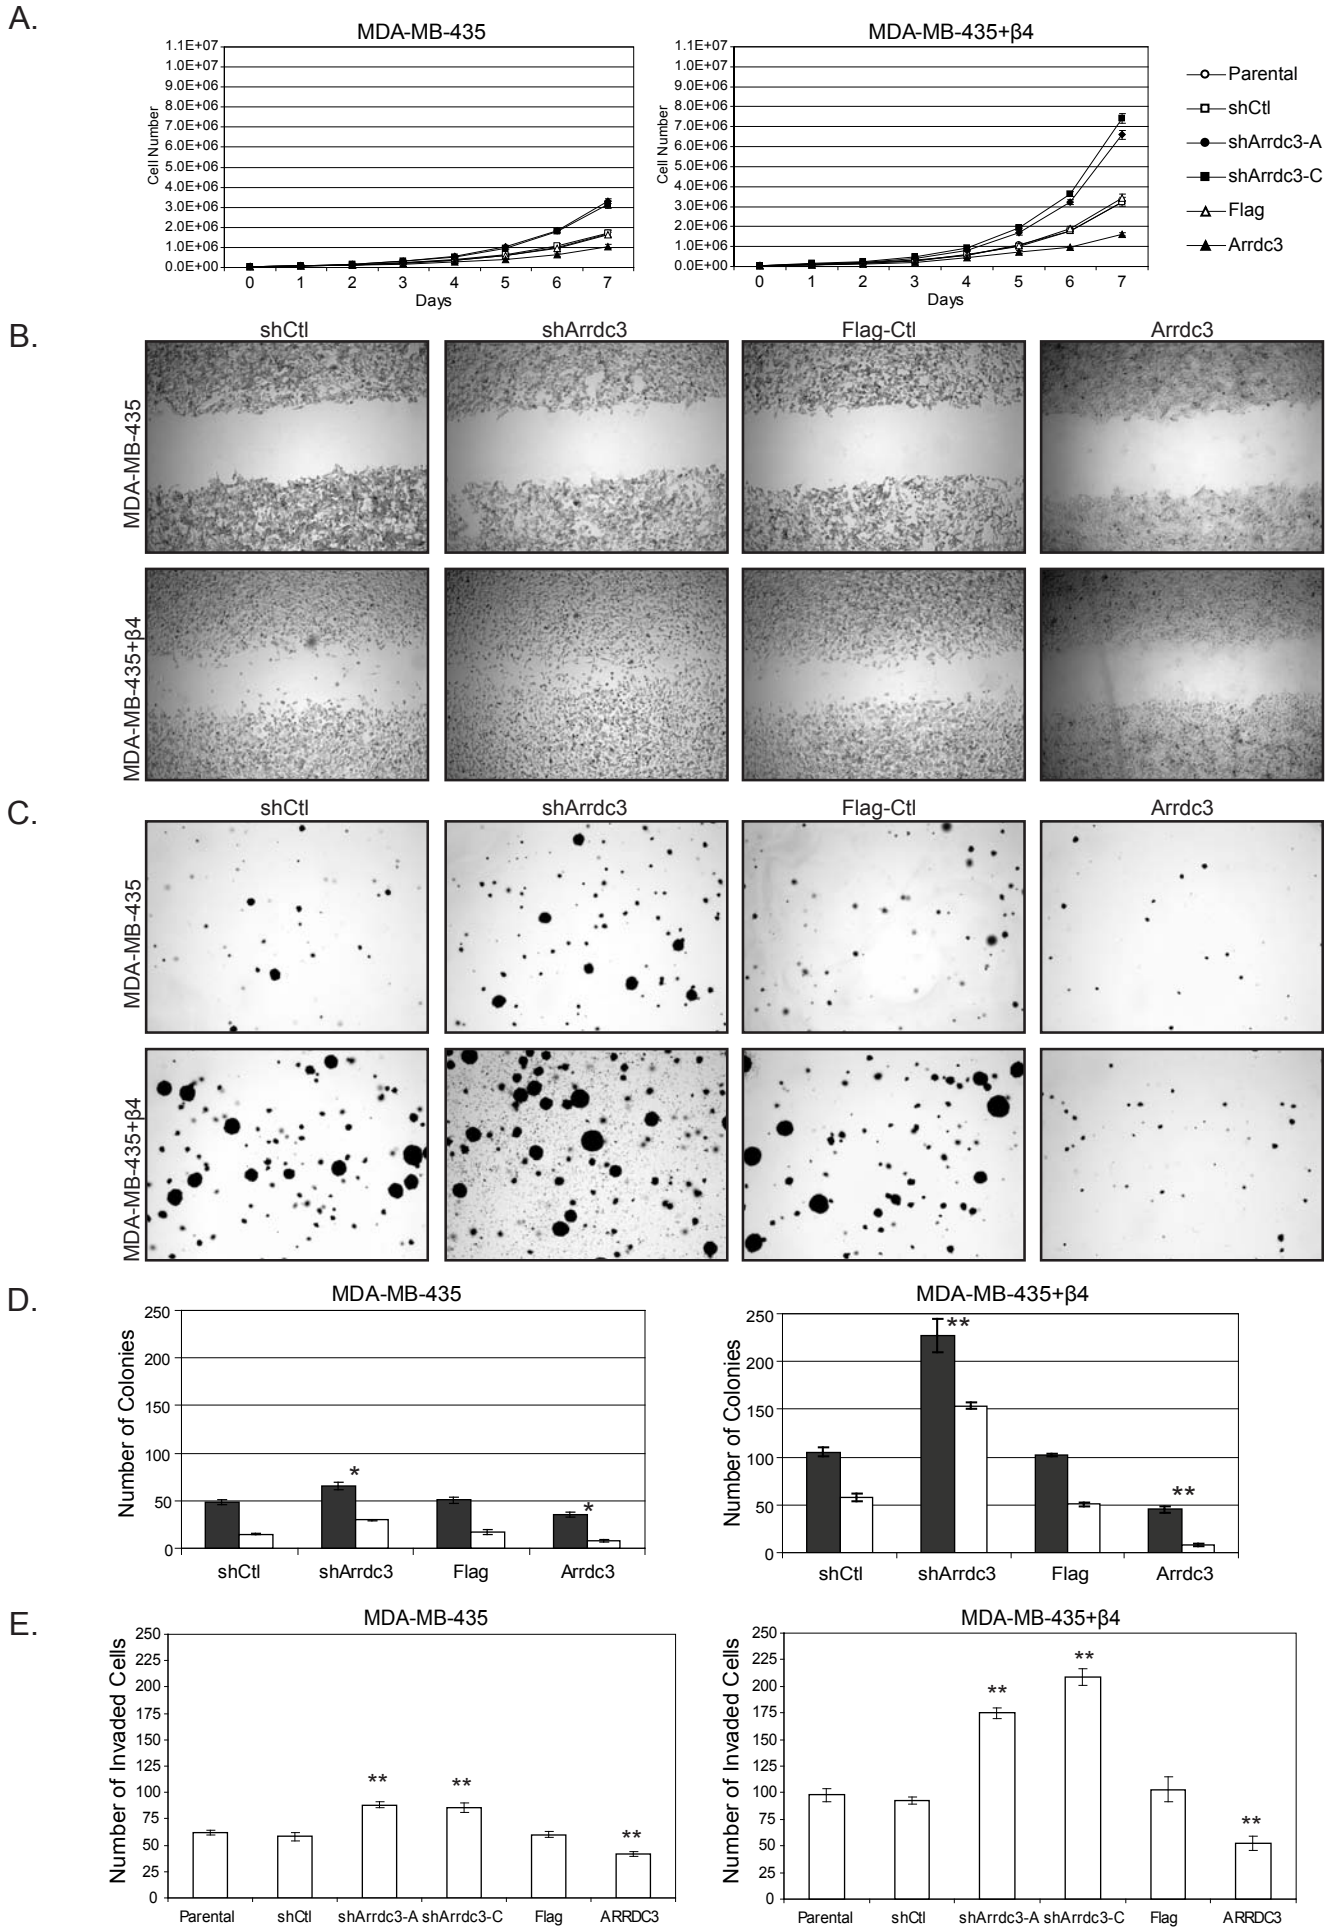

Supplement: onc2010250x1.pdf [file onc2010250x1.pdf]
